# Supplementary material for: Osteoblastogenesis Alters Small RNA Profiles in EVs Derived from Bone Marrow Stem Cells (BMSCs) and Adipose Stem Cells (ASCs)
Source: MDPI journal article supplement (doi:10.3390/biomedicines8100387), 2020-09-28
Supplement: s1 [file s1]

**Supplementary Table 1.** The characteristics of cell donors.

| Donor  | Sex    | Age   | Ethnic group       |
|--------|--------|-------|--------------------|
| BMSC 1 | female | 24    | African American   |
| BMSC 2 | female | 31    | Non-Hispanic White |
| BMSC 3 | female | 18-25 | NA                 |
| ASC 1  | male   | 33    | African American   |
| ASC 2  | female | 44    | African American   |
| ASC 3  | NA     | NA    | NA                 |

NA for the ASC 3 because information cannot be sourced from the company anymore.

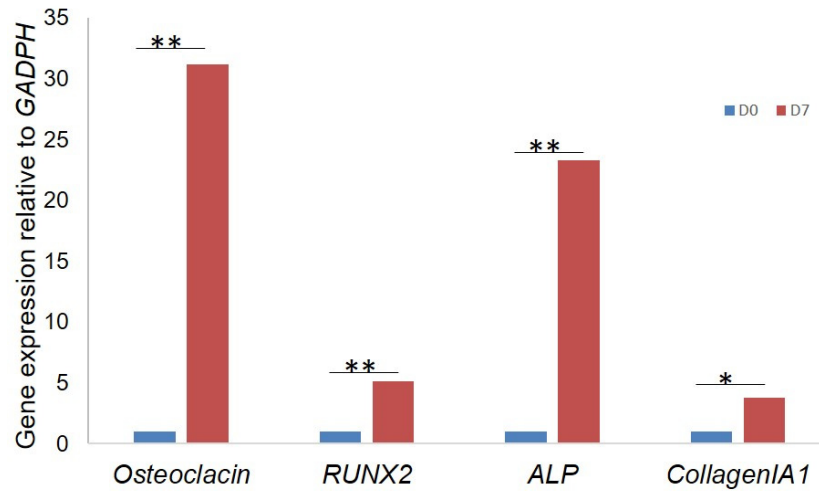

**Supplementary Figure 1.** QPCR quantification of gene expression of osteoblastic differentiation markers in BMSCs. D0 and D7 represent day zero and day seven of osteoblastic differentiation. GAPDH was used to normalize the data. \*  $p$  value<0.05; \*\*  $p$  value<0.005.
